# Supplementary material for: Canagliflozin, an Inhibitor of the Na+-Coupled D-Glucose Cotransporter, SGLT2, Inhibits Astrocyte Swelling and Brain Swelling in Cerebral Ischemia
Source: MDPI journal article supplement (doi:10.3390/cells12182221), 2023-09-06
Supplement: s1 [file s1]

## SUPPLEMENTARY MATERIALS

Canagliflozin, an inhibitor of the Na<sup>+</sup>-coupled D-glucose cotransporter, SGLT2, inhibits astrocyte swelling and brain swelling in cerebral ischemia.

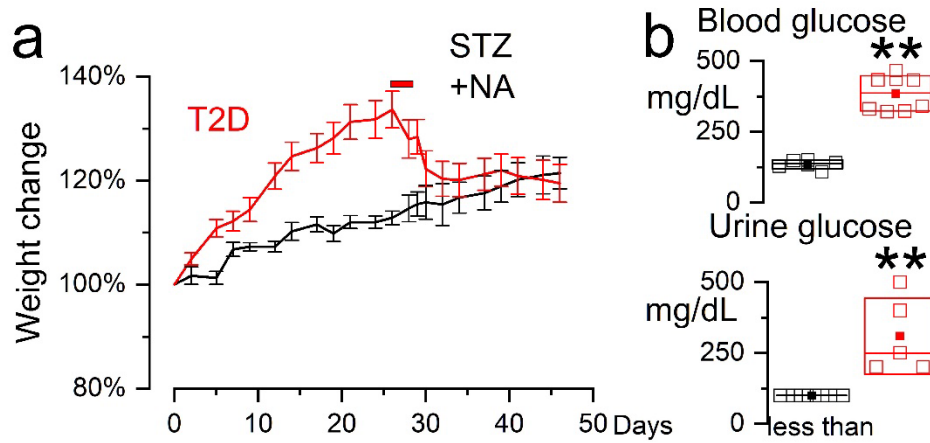

**Figure S1. Murine model of type 2 diabetes mellitus (T2DM).** (a) Change in weight of T2DM mice on high-fat diet (red) vs. control mice on normal diet (black); streptozotocin plus nicotinamide (STZ+NA) were administered at the time indicated by the bar; mean  $\pm$  S.E.; 10–13 mice per group. (b) Blood and urine glucose in T2DM (red) vs. control mice (black) 46 days after starting the high-fat diet; 5–9 mice per group;  $P < 0.01$ .

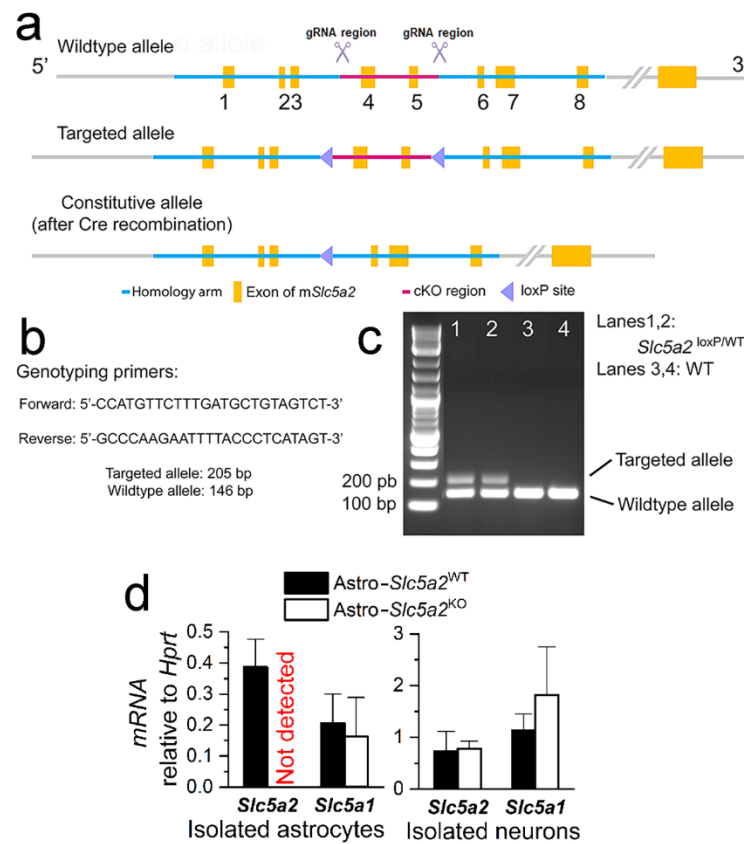

**Figure S2. Astrocyte-specific deletion of *Slc5a2*/SGLT2 (Ast-*Slc5a2*<sup>KO</sup>).** (a) Schematic of targeted allele, and of the allele after Cre recombinase. (b) Genotyping primers used for validation. (c) PCR of DNA from heterozygous *Slc5a2*<sup>loxP/WT</sup> (lanes 1,2) and WT mice (lanes 3,4). (d) *Slc5a2* and *Slc5a1* mRNA in conditional *Slc5a2* knockout mice. *Slc5a2*<sup>fl/fl</sup>;*+GFAP*-cre/ERT2 mice (Astro-*Slc5a2*<sup>KO</sup>) and littermate controls (Astro-*Slc5a2*<sup>WT</sup>) were administered tamoxifen and 2 weeks later underwent MCAo/R (2/6 hours). Isolated astrocytes and neurons from the ipsilateral MCA territory were analyzed by qPCR for *Slc5a2* and *Slc5a1* mRNA. Conditional knockout reduced *Slc5a2* in astrocytes (>40 cycles; "Not detected") but not in neurons and had no effect on *Slc5a1*; mean±SE; data from 3 mice.

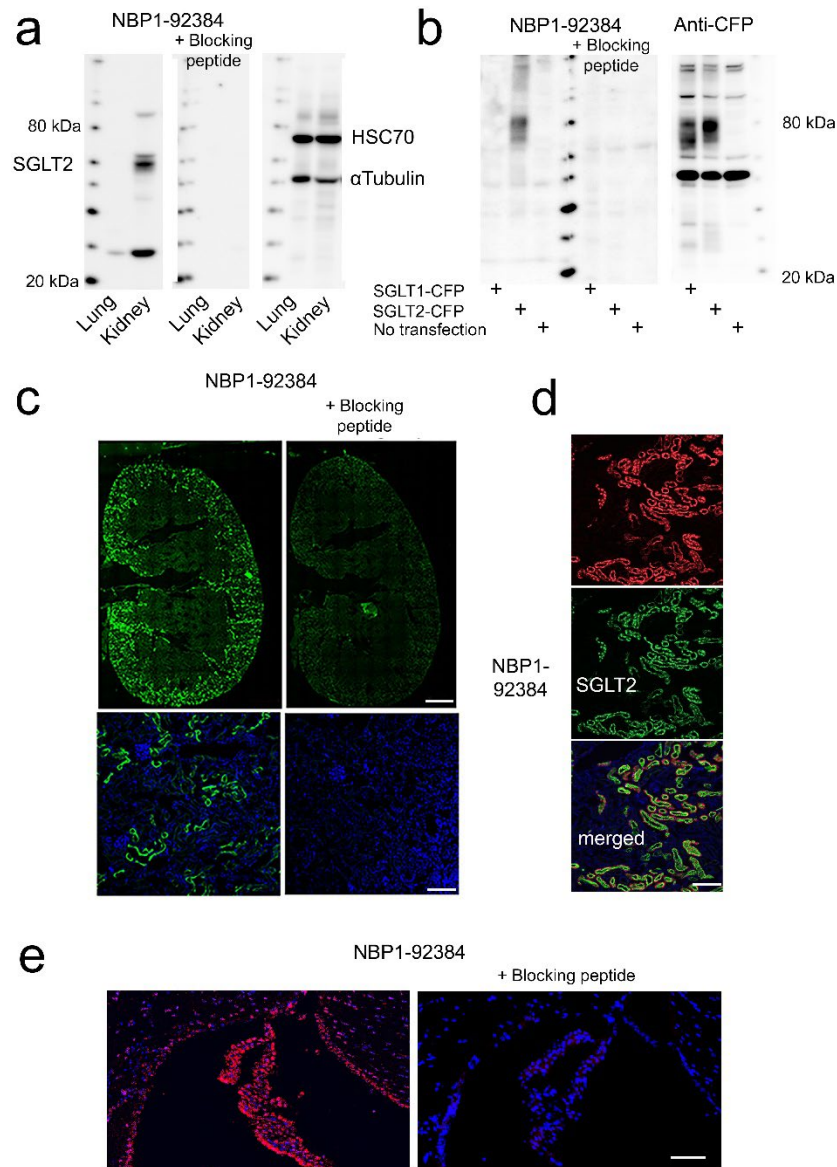

**Figure S3. Validation of Novus anti-SGLT2 antibody.** (a) Immunoblot of lysate from mouse kidney and lung tissues using Novus anti-SGLT2 antibody (#NBP1-92384; Novus Biologicals), without and with pre-absorption of the antibody with the recombinant SGLT2 antigen peptide (#NBP1-92384PEP; Novus Biologicals); immunoblot of HSC70 and  $\alpha$ -tubulin were used as molecular weight and loading controls. (b) Following the expression of cyan fluorescent protein (CFP)-tagged SGLT1 or CFP-tagged SGLT2 or no transfection in COS-7 cells, immunoblot of lysates using Novus anti-SGLT2 antibody, without and with pre-absorption of the antibody with the recombinant SGLT2 antigen peptide; immunoblot for CFP was used as a loading control and served to validate the molecular weight position of the CFP-SGLT2 specific signal. (c) Immunolabeling of mouse kidney section using Novus anti-SGLT2 antibody, without and with pre-absorption of the antibody with the recombinant SGLT2 antigen peptide, shown at low (*upper*) and high (*lower*) magnification; scale bars, 100 and 50 μm. (d) Immunolabeling of mouse kidney section using Novus anti-SGLT2 antibody, followed by processing for RNAScope for *Slc5a2*; individual labelings and the merged image are shown; scale bar, 50 μm. (e) Immunolabeling of mouse choroid plexus using Novus anti-SGLT2 antibody, without and with pre-absorption of the antibody with the recombinant SGLT2 antigen peptide; scale bar, 100 μm.
